# Solenopsin A, a Venom Alkaloid from the Fire Ant *Solenopsis invicta*, Inhibits Quorum-Sensing Signaling in *Pseudomonas aeruginosa*

Jungkuk Park,<sup>1,2</sup> Gunnar F. Kaufmann,<sup>1</sup> J. Phillip Bowen,<sup>3</sup> Jack L. Arbiser,<sup>4</sup> and Kim D. Janda<sup>1,2</sup>

<sup>1</sup>Departments of Chemistry and Immunology, Skaggs Institute for Chemical Biology, and <sup>2</sup>Worm Institute for Research and Medicine, The Scripps Research Institute, La Jolla, California; <sup>3</sup>Center for Drug Discovery, Department of Chemistry and Biochemistry, University of North Carolina at Greensboro; <sup>4</sup>Department of Dermatology, Emory University School of Medicine, Atlanta, Georgia

**In *Pseudomonas aeruginosa*, quorum-sensing (QS) signaling regulates the expression of virulence factors and thus represents an attractive new target for anti-infective therapy. In the present study, we investigated whether solenopsin A, a venom alkaloid from the fire ant, possessed agonistic or antagonistic QS signaling activity in *P. aeruginosa*. We evaluated the modulation of virulence factor expression and transcriptional levels of QS-regulated genes in *P. aeruginosa* by solenopsin A and demonstrated that solenopsin A efficiently disrupted QS signaling. Interestingly, exogenously added C<sub>4</sub>-homoserine lactone (HSL), but not 3-oxo-C<sub>12</sub>-HSL, restored *P. aeruginosa* QS signaling, suggesting that solenopsin A targets the C<sub>4</sub>-HSL-dependent *rhl* QS system.**

*Pseudomonas aeruginosa* is a gram-negative opportunistic pathogen that is able to infect insects, plants, and humans [1]. Importantly, chronic *P. aeruginosa* infections are common in patients with cystic fibrosis, causing serious medical complications. The virulence of *P. aeruginosa* is regulated in a population density-dependent manner, a microbial process known as

“quorum sensing” (QS). QS is a means of intercellular communication used by both gram-negative and gram-positive bacteria and is mediated by small, diffusible molecules termed “autoinducers” [2]. QS allows bacteria to control gene expression in a cell density-dependent manner, and, notably, genes regulated by QS encode a range of virulence factors, such as toxins and proteins involved in biofilm formation. Therefore, QS signaling systems might represent attractive new targets for antimicrobial therapy [3]. In fact, a number of studies aiming to control bacterial virulence via disruption of QS signaling using synthetic small molecules, natural products, or antibodies have been conducted [3–6].

*P. aeruginosa* possesses 2 LuxR/I-type QS systems, termed “*las*” and “*rhl*,” which use 2 distinct acyl-homoserine lactone (AHL) autoinducers, 3-oxo-C<sub>12</sub>-HSL and C<sub>4</sub>-HSL, respectively. The *las* QS signaling system has been shown not only to regulate the production of virulence factors but also to influence the *rhl* QS circuit [1]. However, it has been demonstrated that the *rhl* QS system itself plays a significant role in controlling the pathogenicity of *P. aeruginosa*, for example, through the production of pyocyanin and elastase B and the formation of biofilms. Most inhibitors targeting the *P. aeruginosa* QS signaling circuits reported to date have been structural mimics of its autoinducers [4]. Recently, a new immunotherapeutic approach has been reported that uses QS-quenching anti-AHL antibodies [6].

Solenopsin A (*trans*-2-methyl-6-undecylpiperidine; solenopsin), a venom alkaloid from the fire ant *Solenopsis invicta*, exhibits global structural similarity to 3-oxo-C<sub>12</sub>-HSL, possessing a long hydrocarbon chain attached to piperidine, a nitrogen-containing heterocycle, via a chiral carbon (figure 1) [7]. In addition, it has been shown that both solenopsin and 3-oxo-C<sub>12</sub>-HSL possess antimicrobial activity against gram-positive bacteria [8, 9]. Moreover, a recent study demonstrated that solenopsin and 3-oxo-C<sub>12</sub>-HSL exert a wide range of biochemical effects on mammalian cells [7, 10]. Thus, in the present study, we investigated solenopsin for its potential to act as a QS signaling agonist or antagonist in *P. aeruginosa*. We demonstrate here that it efficiently suppresses QS signaling, resulting in a decrease in virulent factor production and biofilm formation. More interestingly, in contrast to our initial expectation, our data suggest that the main inhibitory effect of solenopsin might be exerted on *rhl* signaling.

**Methods.** PAO1-I, PAO1-O, and PDO 100 strains were provided by B. Iglewski (University of Rochester). Syntheses of solenopsin and its analogues have been described elsewhere [7]. Virulence factor assays, including biofilm analysis, were per-

Received 17 January 2008; accepted 24 April 2008; electronically published XX August 2008.

Potential conflicts of interest: J.L.A. and J.P.B. have filed for US and international patents for solenopsin.

Financial support: Skaggs Institute for Chemical Biology, The Scripps Research Institute (support to K.D.J.); National Institutes of Health (grant R01 AR47901 and Emory Skin Disease Research Core Center Grant P30 AR42687 to J.L.A.); Veterans Administration (Hospital Merit Award to J.L.A.).

Reprints or correspondence: Dr. Kim D. Janda, Dept. of Chemistry and Immunology, Scripps Research Institute, 10550 N. Torrey Pines Rd., La Jolla, CA 92037 (kjanda@scripps.edu).

The Journal of Infectious Diseases 2008; 198:xxx

© 2008 by the Infectious Diseases Society of America. All rights reserved.

0022-1899/2008/19808-00XX\$15.00

DOI: 10.1086/591916

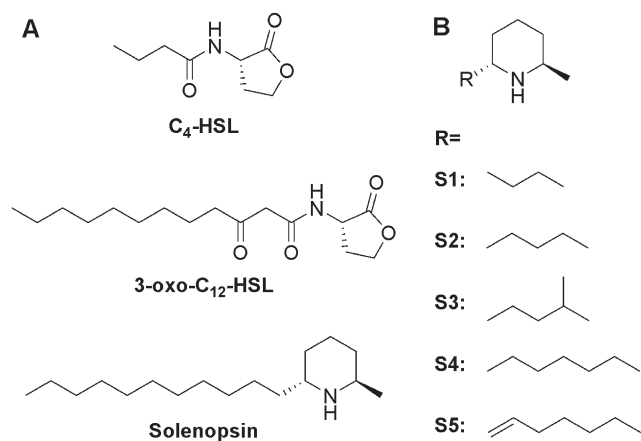

**Figure 1.** Structures of C<sub>4</sub>-homoserine lactone (HSL), 3-oxo-C<sub>12</sub>-HSL, solenopsin A, and solenopsin analogues (S1–S5).

formed following methods using PAO1-I, PAO1-O, or PDO 100 that have been described elsewhere [6]. For real-time polymerase chain reaction (PCR) analysis, fresh Luria-Bertani (LB) medium was inoculated with overnight-grown PAO1 (optical density [OD]<sub>600</sub> ~0.05), and cells were grown for ~3 h to an OD<sub>600</sub>

of ~0.5. Cells were diluted again into fresh LB containing solenopsin (50 μmol/L) and grown for ~5 h to an OD<sub>600</sub> of ~0.6 and for ~6 h to an OD<sub>600</sub> of ~2.2 for log- and stationary-growing phases, respectively. Cells were collected by centrifugation, total RNA was purified, and real-time PCR analysis was conducted as described elsewhere [5]. Nucleotide sequences of the primers used for real-time PCR analysis are as follows: *rpoD* forward, 5'-GGGCGAAGAAGGAAATGGTC-3'; *rpoD* reverse, 5'-CAGGTGGCGTAGGTGGAGAA-3'; *lasB* forward, 5'-TCATCACCGTCGACATGAACAGCA-3'; *lasB* reverse, 5'-AGTCCCGGTACAGTTTGAACACCA-3'; *rhlI* forward, 5'-TCTCTGAATCGCTGGAAGGGCTTT-3'; *rhlI* reverse, 5'-ATGGTCGAACTGGTCAATTCCTG-3'; *lasI* forward, 5'-GCTCAAGTGTCAAGGAGCGCAAA-3'; and *lasI* reverse, 5'-AGTGGTATCGAGAATTCGCCAGCA-3'.

**Results and discussion.** Pyocyanin, a QS-controlled virulence factor of *P. aeruginosa*, has been shown to cause serious tissue damage in chronic lung infection [11]. To examine whether solenopsin has an effect on AHL-mediated QS signaling in *P. aeruginosa*, pyocyanin production was investigated in *P. aeruginosa* in the presence or absence of solenopsin. To quantify the amount of pyocyanin produced, an extraction was con-

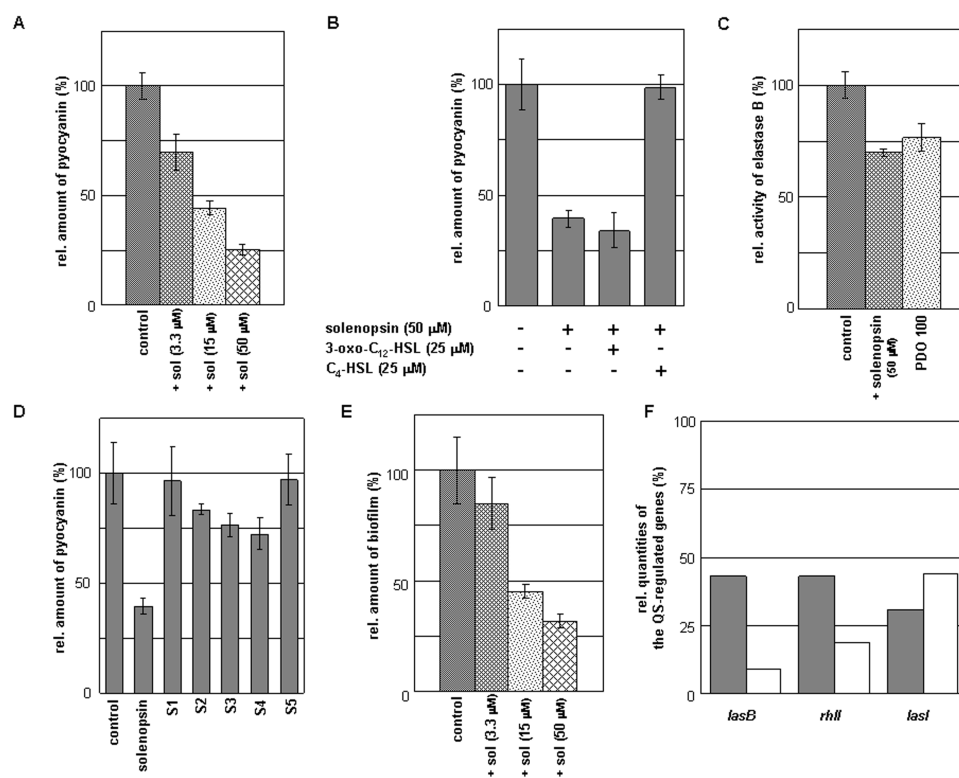

**Figure 2.** Virulence factor assays and real-time polymerase chain reaction analysis. *A*, Inhibition of pyocyanin production in PAO1-O by solenopsin. *B*, Effects of exogenously added acyl-homoserine lactone on the inhibition of pyocyanin production by solenopsin in PAO1-O. HSL, homoserine lactone. *C*, Elastase B production by PAO1-I in the presence of solenopsin (50 μmol/L) and the Δ*rhlI* strain PDO 100. *D*, Inhibition of pyocyanin production in PAO1-O by solenopsin and its analogues (50 μmol/L). *E*, Inhibition of biofilm formation of PAO1-I by solenopsin. *F*, Analysis of relative transcription levels of the indicated genes in the presence of solenopsin (50 μmol/L). For relative quantification, *rpoD* was used as a reference gene [12]. Gray bars represent the log-growing phase (optical density [OD]<sub>600</sub> ~0.6), and white bars represent the stationary-growing phase (OD<sub>600</sub> ~2.2). QS, quorum sensing.

ducted directly from *P. aeruginosa* growth medium. The absorbance of the acidified aqueous solution containing pyocyanin was measured at 520 nm. As shown in figure 2A, a significantly lower amount of pyocyanin ( $\leq 50\%$ ) was found in the culture grown in the presence of solenopsin, indicating that solenopsin efficiently suppressed QS signaling of *P. aeruginosa* (median effective concentration,  $\sim 15 \mu\text{mol/L}$ ). To investigate whether solenopsin acted as an AHL competitor, we tested whether the exogenous addition of the synthetic AHLs could restore pyocyanin production in *P. aeruginosa*. Surprisingly, our data (figure 2B) showed that exogenous  $C_4$ -HSL, but not 3-oxo- $C_{12}$ -HSL, successfully competed with solenopsin and restored QS signaling in *P. aeruginosa*, suggesting that solenopsin might indeed target the *rhl* signaling system. This is especially noteworthy because there have been only a few reports on small-molecule inhibitors that target the *rhl* system. In light of these results, the modulation of elastase B production was investigated; elastase B is a metalloprotease whose expression is partly controlled by  $C_4$ -HSL QS signaling. Figure 2C demonstrates that solenopsin decreased elastase B production, although the effect ( $\sim 30\%$  decrease by  $50 \mu\text{mol/L}$  solenopsin) is not as dramatic as that seen with pyocyanin. We reasoned that elastase B production might be less dependent on *rhl* QS signaling than pyocyanin synthesis. Hence, to support our rationale, we used a  $\Delta rhlI$  mutant strain, PDO 100, in an elastase B assay and showed that  $50 \mu\text{mol/L}$  solenopsin indeed suppressed elastase B production as efficiently as a genetically impaired mutant.

Because solenopsin inhibits the *rhl* QS system in *P. aeruginosa*, it is reasonable to hypothesize that molecules derived from solenopsin containing shorter acyl chains might have an increased antagonistic activity against  $C_4$ -HSL. Therefore, several solenopsin analogues (figure 1) prepared previously were investigated [7], but none of the analogues demonstrated increased QS inhibition (figure 2D).

As stated above, biofilm formation in *P. aeruginosa* is also regulated by QS signaling. Moreover, a recent study revealed that the *rhlI* mutant showed reduced biofilm formation compared with the wild-type strain, while a *lasI* mutant did not show significant impairment in biofilm formation [13]. Thus, solenopsin was also evaluated for its ability to modulate biofilm formation in *P. aeruginosa* via disruption of *rhl* QS signaling. *P. aeruginosa* was grown under static conditions in a polyvinyl chloride 96-well plate with peptone trypticase soy broth [14]. After 48 h of incubation without agitation, the plate was gently washed, and the biofilm was stained with crystal violet solution for relative quantification. Gratifyingly, our analysis demonstrated that the biofilm formation in *P. aeruginosa* was gradually reduced in the presence of solenopsin in a dose-dependent manner, but no changes were found with the solvent control, again indicating that solenopsin disrupts *rhl* QS signaling in *P. aeruginosa* (figure 2E).

Solenopsin has been shown to exert antimicrobial activity against gram-positive bacteria but possessed only weak toxicity toward gram-negative bacteria [8]. To verify that the observed decrease in virulence factor production and biofilm formation was not caused by growth inhibition, we monitored the growth of *P. aeruginosa* in the presence of solenopsin. Notably, no growth defect or retardation was observed over an 8-h period (data not shown), thus strongly suggesting that QS inhibition and the subsequent reduction of virulence factor production is indeed due to competition of solenopsin with  $C_4$ -HSL. Last, the transcription of 3 QS-controlled genes—namely, *lasB* (encoding elastase B) as well as *lasI* and *rhlI* (the 2 autoinducer synthase genes)—was analyzed by real-time PCR in the presence or absence of solenopsin [15]. Our data demonstrated that transcription of these QS-controlled genes was decreased  $\sim 2$ -fold (figure 2F), further confirming that solenopsin is a QS signaling inhibitor in *P. aeruginosa*.

In summary, we have demonstrated that solenopsin A, a venom alkaloid from the fire ant *S. invicta*, suppressed QS signaling in *P. aeruginosa*, resulting in modulation of virulence factor production as well as biofilm formation. An important implication of our data is that solenopsin might act mainly on the *rhl* QS signaling system as a competitor of  $C_4$ -HSL. We have recently introduced a QS-quenching immunotherapeutic strategy that might not be readily applicable to the *rhl* system, because the  $C_4$ -HSL molecule might be too diminutive to elicit a specific host immune response against it. In this regard, solenopsin could be a valuable starting point for the discovery of novel  $C_4$ -HSL antagonists and thus immensely valuable to the further development of therapeutic *rhl* signaling inhibitors.

## Acknowledgment

We thank Prof. Barbara H. Iglewski (University of Rochester) for kindly providing the bacterial strains used in our experiments.

## References

- Schuster M, Greenberg EP. A network of networks: quorum-sensing gene regulation in *Pseudomonas aeruginosa*. *Int J Med Microbiol* **2006**; 296:73–81.
- Waters CM, Bassler BL. Quorum sensing: cell-to-cell communication in bacteria. *Annu Rev Cell Dev Biol* **2005**; 21:319–46.
- Clatworthy AE, Pierson E, Hung DT. Targeting virulence: a new paradigm for antimicrobial therapy. *Nat Chem Biol* **2007**; 3:541–8.
- Geske GD, O'Neill JC, Miller DM, Mattmann ME, Blackwell HE. Modulation of bacterial quorum sensing with synthetic ligands: systematic evaluation of n-acylated homoserine lactones in multiple species and new insights into their mechanisms of action. *J Am Chem Soc* **2007**; 129: 13613–25.
- Park J, Jagasia R, Kaufmann GF, et al. Infection control by antibody disruption of bacterial quorum sensing signaling. *Chem Biol* **2007**; 14: 1119–27.
- Kaufmann GF, Sartorio R, Lee SH, et al. Antibody interference with N-acyl homoserine lactone-mediated bacterial quorum sensing. *J Am Chem Soc* **2006**; 128:2802–3.
- Arbiser JL, Kau T, Konar M, et al. Solenopsin, the alkaloidal component of the fire ant (*Solenopsis invicta*), is a naturally occurring inhibitor of

- phosphatidylinositol-3-kinase signaling and angiogenesis. *Blood* **2007**; 109:560–5.
8. Jouvenaz DP, Blum MS, Mac CJ. Antibacterial activity of venom alkaloids from the imported fire ant, *Solenopsis invicta* Buren. *Antimicrob Agents Chemother* **1972**; 2:291–3.
  9. Kaufmann GF, Sartorio R, Lee SH, et al. Revisiting quorum sensing: discovery of additional chemical and biological functions for 3-oxo-N-acylhomoserine lactones. *Proc Natl Acad Sci USA* **2005**; 102:309–14.
  10. Kravchenko VV, Kaufmann GF, Mathison JC, et al. N-(3-oxo-acyl)homoserine lactones signal cell activation through a mechanism distinct from the canonical pathogen-associated molecular pattern recognition receptor pathways. *J Biol Chem* **2006**; 281:28822–30.
  11. Lau GW, Ran H, Kong F, Hassett DJ, Mavrodi D. *Pseudomonas aeruginosa* pyocyanin is critical for lung infection in mice. *Infect Immun* **2004**; 72:4275–8.
  12. Savli H, Karadenizli A, Kolayli F, Gundes S, Ozbek U, Vahaboglu H. Expression stability of six housekeeping genes: a proposal for resistance gene quantification studies of *Pseudomonas aeruginosa* by real-time quantitative RT-PCR. *J Med Microbiol* **2003**; 52:403–8.
  13. Favre-Bonte S, Kohler T, Van Delden C. Biofilm formation by *Pseudomonas aeruginosa*: role of the C4-HSL cell-to-cell signal and inhibition by azithromycin. *J Antimicrob Chemother* **2003**; 52:598–604.
  14. O'Toole GA, Pratt LA, Watnick PI, Newman DK, Weaver VB, Kolter R. Genetic approaches to study of biofilms. *Methods Enzymol* **1999**; 310: 91–109.
  15. Wagner VE, Bushnell D, Passador L, Brooks AI, Iglewski BH. Microarray analysis of *Pseudomonas aeruginosa* quorum-sensing regulons: effects of growth phase and environment. *J Bacteriol* **2003**; 185:2080–95.
